# Supplementary material
Source: publisher figshare collection journal article supplement (https://sage.figshare.com/ndownloader/files/17771318)
Supplement: Supplementary file 1 [file 17771318]

## Supplementary File 1

Method to select the patients from those without reimbursable enteral formulas (REF)

prescription to compare healthcare cost and exit rate from the insurance with those with REF prescription.

$p$ : Patient

$U^1 = \{p_1^1, p_2^1 \dots, p_n^1\}$ : REF Group (n = 502)

$U^2 = \{p_1^2, p_2^2 \dots, p_m^2\}$ : Matching patient group (m = 607)

$c^0(p)$ : Patient's average healthcare cost during the 6 months prior to the index month

$c^1(p)$ : Patient's healthcare cost during the index month

The smallest squared-sum (LSQ(S)) of the healthcare cost difference was defined as shown below for the discretionary S sub-set of  $U^2$  (control patients).

$$LSQ(S) = \left( \frac{\sum_{p^2 \in S} c^0(p^2)}{\# S} - \frac{\sum_{i=1}^n c^0(p_i^1)}{n} \right)^2 + \left( \frac{\sum_{p^2 \in S} c^1(p^2)}{\# S} - \frac{\sum_{i=1}^n c^1(p_i^1)}{n} \right)^2$$

The  $S^{matched}$  sub-set of  $U^2$ , which matches  $U^1$ , was defined as follows.

$$S^{matched} = \{LSQ(S^{matched}) = \min LSQ(S) | S \subset U^2\}$$

In reality,  $\min LSQ(S)$  was calculated by choosing from a universe of 10,000 random sub-set combinations, a combination that would yield  $\geq 100$  patients.
